# Supplementary material for: Association Between Preexisting Heart Failure With Reduced Ejection Fraction and Fluid Administration Among Patients With Sepsis
Source: PubMed Central journal article supplement (PMC9547322; doi:10.1001/jamanetworkopen.2022.35331), 2022-10-07
Supplement: jamanetwopen-e2235331-s001.pdf [file jamanetwopen-e2235331-s001.pdf]

## Supplementary Online Content

Powell RE, Kennedy JN, Senussi MH, Barbash IJ, Seymour CW. Association between preexisting heart failure with reduced ejection fraction and fluid administration among patients with sepsis. *JAMA Netw Open*.

2022;5(10):e2235331. doi:10.1001/jamanetworkopen.2022.35331

**eFigure.** Frequency Distribution of Left Ventricular Ejection Fraction in Patients With Sepsis-3 and Septic Shock

**eTable 1.** Crude Outcomes

**eTable 2.** Multivariable Model of In-Hospital Mortality Among Patients With Septic Shock (N=2,287)

**eTable 3.** Sensitivity Analyses – 30 mL/kg Intravenous Fluid Administration

**eTable 4.** Sensitivity Analyses – In-Hospital Mortality

This supplementary material has been provided by the authors to give readers additional information about their work.

**eFigure.** Frequency Distribution of Left Ventricular Ejection Fraction in Patients With Sepsis-3 and Septic Shock

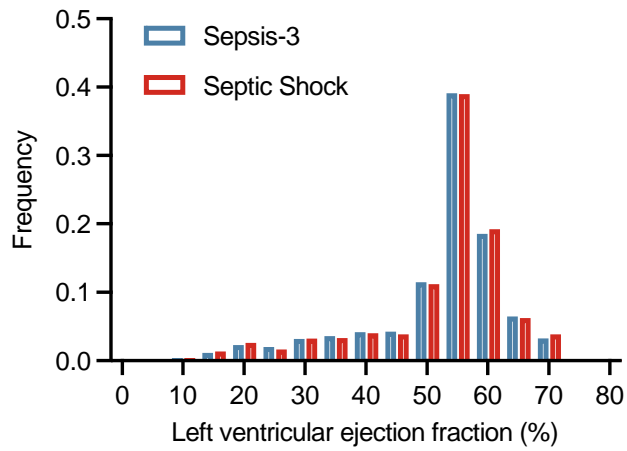

Frequency distribution of left ventricular ejection fraction among patients with Sepsis-3 (blue) and septic shock (red).

| <b>eTable 1. Crude Outcomes</b>                                              |                                  |                            |                                  |                          |
|------------------------------------------------------------------------------|----------------------------------|----------------------------|----------------------------------|--------------------------|
|                                                                              | <b>Septic Shock</b>              |                            | <b>Sepsis-3</b>                  |                          |
| <b>Outcomes</b>                                                              | <b>Normal EF<br/>(N = 1,911)</b> | <b>HFrEF<br/>(N = 380)</b> | <b>Normal EF<br/>(N = 4,394)</b> | <b>HFrEF<br/>(N=884)</b> |
| In-hospital mortality – no. (%)                                              | 244 (12.8)                       | 47 (12.4)                  | 371 (8.4)                        | 78 (8.8)                 |
| Mechanical ventilation – no. (%) <sup>a</sup>                                | 549 (28.7)                       | 96 (25.3)                  | 883 (20.1)                       | 143 (16.2)               |
| Total days – median (IQR)                                                    | 5 (3, 10)                        | 4 (3, 10)                  | 5 (2, 9)                         | 4 (2, 9.5)               |
| Vasopressors – no. (%) <sup>b</sup>                                          | 591 (30.9)                       | 121 (31.8)                 | 591 (13.5)                       | 121 (13.7)               |
| Total days – median (IQR)                                                    | 3 (2, 4)                         | 3 (2, 5)                   | 3 (2, 4)                         | 3 (2, 6)                 |
| ICU admission – no. (%)                                                      | 1495 (78.2)                      | 304 (80.0)                 | 2565 (58.4)                      | 514 (58.1)               |
| Hospital length of stay – median (IQR), days                                 | 7.1 (4.5, 11.5)                  | 6.9 (4.5, 11.5)            | 6.2 (3.9, 10.1)                  | 6.2 (3.9, 9.9)           |
| Intravenous fluid volume given in 6 hours – median (IQR), mL/kg <sup>c</sup> | 20.5 (7.7, 39.4)                 | 15.6 (5.3, 30.2)           | 10.1 (1.6, 24.6)                 | 6.1 (0.9, 18.9)          |
| 30 cc/kg given in 6 hours – no. (%)                                          | 699 (36.6)                       | 96 (25.3)                  | 885 (20.1)                       | 113 (12.8)               |

<sup>a</sup> Includes invasive mechanical ventilation delivered at any time during the hospitalization, either via endotracheal tube or tracheostomy, excluding noninvasive ventilation strategies

<sup>b</sup> Vasopressors include norepinephrine, epinephrine, phenylephrine, vasopressin, and dopamine

<sup>c</sup> Intravenous fluid volume is calculated based on ideal body weight, and represents all crystalloid solution given within the first 6 hours of sepsis onset.

*Abbreviations:* EF: ejection fraction; HFrEF: heart failure with reduced ejection fraction; IQR: interquartile range; ICU: intensive care unit

| <b>eTable 2. Multivariable Model of In-Hospital Mortality Among Patients With Septic Shock (N=2,287)</b> |            |                   |                |
|----------------------------------------------------------------------------------------------------------|------------|-------------------|----------------|
| <b>Variable<sup>a</sup></b>                                                                              | <b>aOR</b> | <b>aOR 95% CI</b> | <b>P-value</b> |
| HFrEF                                                                                                    | 0.92       | 0.69 – 1.24       | 0.590          |
| Age <sup>b</sup>                                                                                         | 1.03       | 1.02 – 1.04       | <0.001         |
| Race                                                                                                     |            |                   |                |
| Black                                                                                                    | REF        | -                 | -              |
| White                                                                                                    | 0.67       | 0.51 – 0.90       | 0.007          |
| Other <sup>c</sup>                                                                                       | 1.52       | 0.76 – 3.05       | 0.241          |
| Sex                                                                                                      |            |                   |                |
| Female                                                                                                   | REF        | -                 | -              |
| Male                                                                                                     | 1.03       | 0.76 – 1.37       | 0.890          |
| Elixhauser <sup>d</sup>                                                                                  | 0.99       | 0.92 – 1.06       | 0.722          |
| SOFA in 6 hours <sup>e</sup>                                                                             | 1.26       | 1.20 – 1.32       | <0.001         |

<sup>a</sup> Hospital of admission included as a random effect

<sup>b</sup> Adjusted OR corresponds to a 1 year increase in age.

<sup>c</sup> Other race corresponds to Chinese, Filipino, Hawaiian, American Indian/Alaskan, Asian, Hawaiian/Other Pacific Islander, Middle Eastern, Native American, or Pacific Islander

<sup>d</sup> Elixhauser is a method of categorizing comorbidities of patients based on the International Classification of Diseases (ICD) diagnosis codes found in administrative data, ranging from 0 to 31. Adjusted OR corresponds to a 1 point change in Elixhauser.

<sup>e</sup> SOFA score corresponds to the severity of organ dysfunction, reflecting six organ systems each with a score range of 0 to 4 points (cardiovascular, hepatic, hematologic, respiratory, neurological, renal), with a total score range of 0 to 24 points. Adjusted OR corresponds to a 1 point change in SOFA score.

Abbreviations: aOR: adjusted odds ratio; CI: confidence interval; HFrEF: heart failure with reduced ejection fraction; SOFA: sequential organ failure assessment score

| <b>eTable 3. Sensitivity Analyses – 30 mL/kg Intravenous Fluid Administration</b> |                    |                   |                |
|-----------------------------------------------------------------------------------|--------------------|-------------------|----------------|
| <b>Feature <sup>a</sup></b>                                                       | <b>aOR - HFrEF</b> | <b>aOR 95% CI</b> | <b>P-value</b> |
| Primary Model                                                                     | 0.63               | 0.47 – 0.85       | 0.002          |
| Including all patients with Sepsis-3                                              | 0.64               | 0.48 – 0.87       | 0.004          |
| Excluding TTEs obtained within 1 month of sepsis                                  | 0.68               | 0.51 – 0.90       | 0.008          |
| Including RV dysfunction as a covariate                                           | 0.69               | 0.50 – 0.96       | 0.028          |

<sup>a</sup> Hospital of admission included as random effect

*Abbreviations:* aOR: adjusted odds ratio; CI: confidence interval; HFrEF: heart failure with reduced ejection fraction; TTE: transthoracic echocardiogram; RV: right ventricular

| <b>eTable 4. Sensitivity Analyses – In-Hospital Mortality</b> |                    |                   |                |
|---------------------------------------------------------------|--------------------|-------------------|----------------|
| <b>Feature <sup>a</sup></b>                                   | <b>aOR - HFrEF</b> | <b>aOR 95% CI</b> | <b>P-value</b> |
| Primary Model                                                 |                    |                   |                |
| Including all patients with Sepsis-3                          | 1.00               | 0.82 – 1.22       | 0.993          |
| Excluding TTEs obtained within 1 month of sepsis              | 1.08               | 0.83 – 1.41       | 0.561          |
| Including RV dysfunction as a covariate                       | 0.87               | 0.60 – 1.26       | 0.449          |

<sup>a</sup> Hospital of admission included as random effect

*Abbreviations:* aOR: adjusted odds ratio; CI: confidence interval; HFrEF: heart failure with reduced ejection fraction; TTE: transthoracic echocardiogram; RV: right ventricular
